# Supplementary material
Source: publisher site journal article supplement (https://www.dovepress.com/article/314638)
Supplement: Supplementary file 1 [file get_supplementary_file.php]

| Supplementary Table 1: Heterozygosity, HWE, and minor allele frequency of the IL18 SNPs. | | | | | | | |
| --- | --- | --- | --- | --- | --- | --- | --- |
| Name | Position* | ObsHET | PredHET | HWpval | MAF | Alleles | Region |
| rs11214101 | 112140139 | 0 | 0 | 1 | 0 | T:T | Non-codon region |
| rs544354 | 112141907 | 0.439 | 0.461 | 0.8822 | 0.36 | G:A | Terminator region |
| rs360727 | 112143366 | 0.193 | 0.254 | 0.1804 | 0.149 | G:A | 3’ UTR |
| rs5744292 | 112143413 | 0.07 | 0.1 | 0.2583 | 0.053 | A:G | 3’ UTR |
| rs360728 | 112143429 | 0.228 | 0.278 | 0.3317 | 0.167 | C:G | 3’ UTR |
| rs360729 | 112146198 | 0.193 | 0.278 | 0.0693 | 0.167 | A:T | intron variant |
| rs549908 | 112150193 | 0.211 | 0.266 | 0.2488 | 0.158 | T:G | synonymous variant Exon 1 |
| rs5744260 | 112150821 | 0.053 | 0.051 | 1 | 0.026 | G:A | Intron variant |
| rs360714 | 112161323 | 0.333 | 0.278 | 0.33 | 0.167 | A:G | Intron variant |
| rs7106524 | 112162913 | 0.456 | 0.474 | 0.9386 | 0.386 | G:A | Intron variant |
| rs5744231 | 112163324 | 0.018 | 0.017 | 1 | 0.009 | C:T | Intron variant |
| rs360718 | 112164016 | 0.246 | 0.289 | 0.4288 | 0.175 | A:C | 5’ UTR |
| rs187238 | 112164265 | 0.246 | 0.266 | 0.8172 | 0.158 | C:G | 5’ UTR |
| rs1946518 | 112164735 | 0.491 | 0.496 | 1 | 0.456 | G:T | 5’ UTR |
| rs1946519 | 112164784 | 0.526 | 0.499 | 0.9307 | 0.474 | C:A | 5’ UTR |
| rs1293344 | 112166661 | 0.263 | 0.301 | 0.539 | 0.184 | A:G | Enhancer variant |

* Homo sapiens:GRCh37.p13 (GCF_000001405.25)Chr 11 (NC_000011.9).

| Supplementary Table 2. List of primer sequences used for SNP detection in this study. M13 tag was attached to all primers for sequencing. | |
| --- | --- |
| **SNP** | **Primer sequences (5’-3’) *** |
| rs11214101 | F - CGCAGGTAAGGAACGAGAAT  R - CCTGGGAGGTAGAAGTTGCA |
| rs544354 | F - TCTGGACTCTGAAATCTGTTCCT  R - CAACAAAGTGAGACCCCGTC |
| rs360727 | F - GTCTGTTTGTTTGCTTTTGTGAA  R - TTAAAATTTCATGCCGGGCG |
| rs5744292 | F - AGTTTTGCTGTTGTTGCCCA  R - TTAAAATTTCATGCCGGGCG |
| rs360728 | F - GCTCACCACAACCTCTACCT  R - TTCAGAGAAGTGTCCCAGGA |
| rs360729 | F - GACCACTCCCAGCCATCATA  R - GCATGCACCTGTAATCCCAG |
| rs549908 | F - TGAGGATTGGGACTAGCACG  R - AGACCGGTCAGAAAGTAGGC |
| rs5744260 | F - CTTCCCGTCTTCCCTTCCTT  R - AGGAGGTAGAATTGCTGGGT |
| rs360714 | F - CCCAGGAGTAAGCAGTGACA  R - TGACCTCAAGTGATCCAGCC |
| rs7106524 | F - GGAGGGCTTTGGAAATCAGG  R - ACCTTTGGACTGGGCTACAA |
| rs5744231 | F - TTGTAGCCCAGTCCAAAGGT  R - GCTGGATTCTCATCTGCTTTG |
| rs360718 | F - TGTTGATACTGACTGCTCATCG  R - AGAGCCCCAACTTTTACGGA |
| rs187238 | F - AGGTTCCTTTCCTCTTCCCG  R - GTTTTGTGCTGAAGTGTGACC |
| rs1946518 | F - CCCTTCCTCCCAAGCTCAAT  R - ACACTCTGCTCTTCAAACGT |
| rs1946519 | F - CCCTTCCTCCCAAGCTCAAT  R - TGCCACCTTGCTAATTCCCT |
| rs1293344 | F - ACCGGCTTCTTCACAAACAG  R - TCCAGAGCCTCAGTTACTGC |

F: Forward.

R: Reverse.

* Homo sapiens:GRCh37.p13 (GCF_000001405.25)Chr 11 (NC_000011.9).

| Supplementary Table 3. Primers used for the generation of the *IL-18* promoter deletion fragments. | | | |
| --- | --- | --- | --- |
| Position | Size (bp) | Fragment Name | Primer sequences (5’-3’)* |
| -795 to +28 | 823 bp | F1–R1 | F - **CGCCTA**GAGCTCGAACATAAGCCCTAAATATATGTATCC  R - **TAGGCG**GAGCTCCAAGCTGGGGAGAGAATGAG |
| -795 to + -523 | 276 bp | F1–R2 | F - **CGCCTA**GAGCTCGAACATAAGCCCTAAATATATGTATCC  R - **TAGGCG**GAGCTCTCAGTGGAACAGGAGTCCATT |
| -182 to + 28 | 209 bp | F3-R1 | F - **CGCCTA**GAGCTCACAGGTTTTGGAAGGCACAG  R - **TAGGCG**GAGCTCCAAGCTGGGGAGAGAATGAG |

F: Forward.

R: Reverse.

* Homo sapiens:GRCh37.p13 (GCF_000001405.25)Chr 11 (NC_000011.9).

Sac I restriction recognition sequence is underlined.

Bold: extra sequence.

| Supplementary Table 4. Primers used for the generation of the IL-18 3’ UTR deletion fragments. | | | |
| --- | --- | --- | --- |
| Position | Size (bp) | Fragment Name | Primer sequences (5’-3’)* |
| +20472 to +20984 | 519 bp | F1-R1 | F - **CGCCTA**GAGCTCTGTTCACTGTTCAAAACGAA  R - **TAGGCG**TCTAGATTGCTTTTGTGAAAGTTCAT |
| +20500 to +20984 | 490 bp | F2-R1 | F - **CGCCTA**GAGCTCTTAAAATTTCATGCCGGGCG  R - **TAGGCG**TCTAGATTGCTTTTGTGAAAGTTCAT |
| +20472 to +20733 | 294 bp | F1-R2 | F - **CGCCTA**GAGCTCTGTTCACTGTTCAAAACGAA  R - **TAGGCG**TCTAGAGCTCACCACAACCTCTACCT |

F: Forward.

R: Reverse.

* Homo sapiens:GRCh37.p13 (GCF_000001405.25)Chr 11 (NC_000011.9).

Sac I restriction recognition sequence is underlined (in Forward primers).

Xba I restriction recognition sequence is in underlined (in Reverse primers).

Bold: extra sequence.
